# Supplementary material for: Technical note: Stage and water width measurement of a mountain stream using a simple time-lapse camera
Source: Copernicus journal article supplement (doi:10.5194/hess-22-1-2018), 2018-01-03
Supplement: Supplementary file 1 [file hess-22-1-2018-supplement.zip]

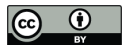

## *Supplement of*

# **Technical note: Stage and water width measurement of a mountain stream using a simple time-lapse camera**

**Pauline Leduc et al.**

*Correspondence to:* Pauline Leduc ([pleduc3@uwo.ca](mailto:pleduc3@uwo.ca))

- [hess-22-1-2018-supplement-title-page.pdf](#)
- Supplement
  - [DATA2.asc](#)
  - [Supplementary material.pdf](#)

The copyright of individual parts of the supplement might differ from the CC BY 3.0 License.
