# Supplementary material for: Technical note: Stage and water width measurement of a mountain stream using a simple time-lapse camera
Source: Copernicus journal article supplement (doi:10.5194/hess-22-1-2018), 2018-01-03
Supplement: Supplementary file 2 [file hess-22-1-2018-supplement.zip]

# Supplementary material

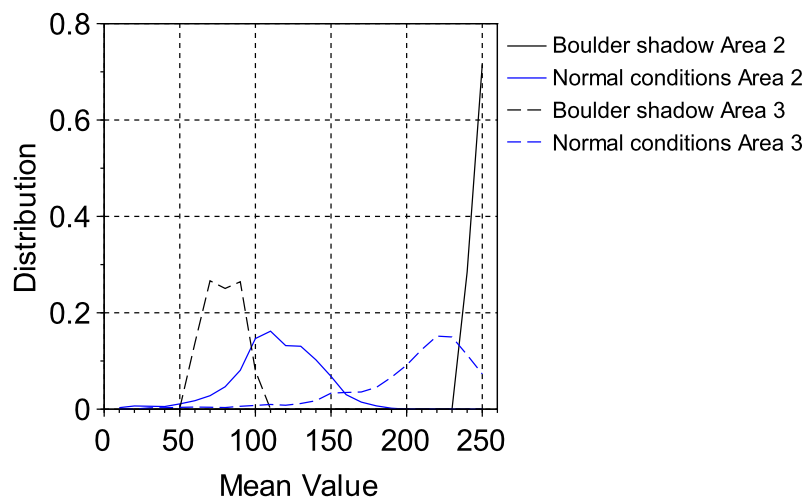

**Figure S1.** The boulder shadow threshold setting - Test 2. The x axis represents the mean value of the different areas of the picture. When the boulder shadow is on the picture, the mean value of Area 2 is higher than 230 and the mean value of Area 3 is less than 110 (black lines). To avoid a large overlap, we set the thresholds at 235 and 95 respectively.

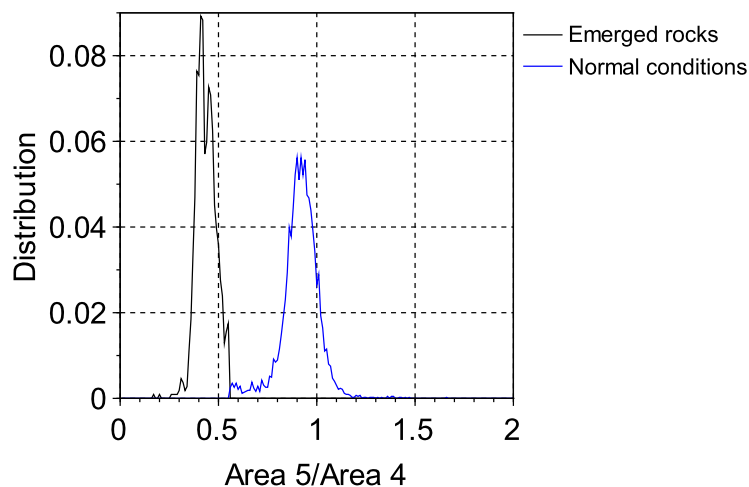

**Figure S2.** The exposed rocks threshold setting - Test 3. When the rocks are exposed in the stream, the ratio of mean value of Area 5 (black line) and Area 4 is less than 0.5. We set the threshold at 0.5.

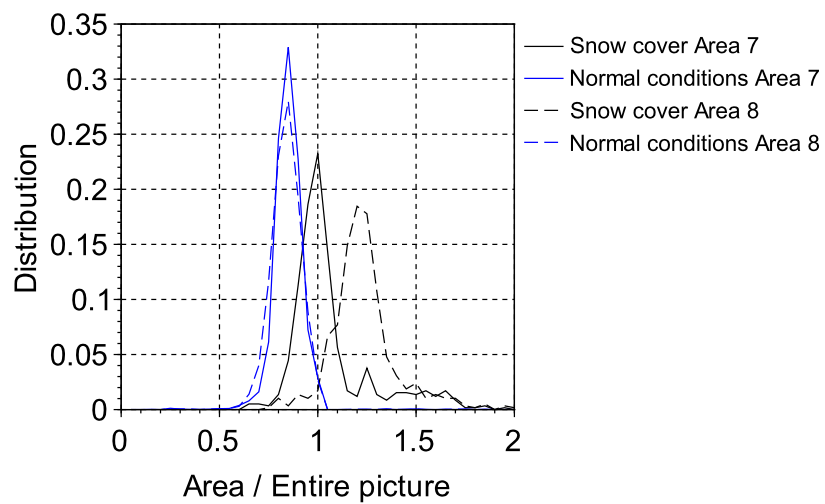

**Figure S3.** Light snow cover threshold setting - Test 4. When there is no snow cover on the picture, mean values of Area 7 and 8 (blue lines) are less than the mean value of the picture. We set the ratio threshold at 1.
